# Supplementary material for: Wide Distribution and Intraspecies Diversity in the Pathogenicity of Calonectria in Soil from Eucalyptus Plantations in Southern Guangxi of China
Source: MDPI journal article supplement (doi:10.3390/jof9080802), 2023-07-29
Supplement: s1 [file s1]

## Supplementary materials

**Supplementary Figure S1.** Phylogenetic tree of *Calonectria* species based on maximum likelihood (ML) analyses of the *tef1* gene sequences in this study. Bootstrap support value  $\geq 70\%$  for ML and posterior probabilities values  $\geq 0.95$  for Bayesian inference (BI) analyses are presented above the branches as follows: ML/BI. Bootstrap values  $< 70\%$  or probabilities values  $< 0.95$  are marked with “\*”, and absent analysis values are marked with “-”. Ex-type isolates are marked with “T”. Isolates sequenced in this study are highlighted in bold and shown in color. Two isolates of *Curviciadiella cigna* (CBS 109167 and CBS 109168) were used as outgroups.

**Supplementary Figure S2.** Phylogenetic tree of *Calonectria* species based on maximum likelihood (ML) analyses of the *tub2* gene sequences in this study. Bootstrap support value  $\geq 70\%$  for ML and posterior probabilities values  $\geq 0.95$  for Bayesian inference (BI) analyses are presented above the branches as follows: ML/BI. Bootstrap values  $< 70\%$  or probabilities values  $< 0.95$  are marked with “\*”, and absent analysis values are marked with “-”. Ex-type isolates are marked with “T”. Isolates sequenced in this study are highlighted in bold and shown in color. Two isolates of *Curviciadiella cigna* (CBS 109167 and CBS 109168) were used as outgroups.

**Supplementary Figure S3.** Phylogenetic tree of *Calonectria* species based on maximum likelihood (ML) analyses of the *cmdA* gene sequences in this study. Bootstrap support value  $\geq 70\%$  for ML and posterior probabilities values  $\geq 0.95$  for Bayesian inference (BI) analyses are presented above the branches as follows: ML/BI. Bootstrap values  $< 70\%$  or probabilities values  $< 0.95$  are marked with “\*”, and absent analysis values are marked with “-”. Ex-type isolates are marked with “T”. Isolates sequenced in this study are highlighted in bold and shown in color. Two isolates of *Curviciadiella cigna* (CBS 109167 and CBS 109168) were used as outgroups.

**Supplementary Figure S4.** Phylogenetic tree of *Calonectria* species based on maximum likelihood (ML) analyses of the *his3* gene sequences in this study. Bootstrap support value  $\geq 70\%$  for ML and posterior probabilities values  $\geq 0.95$  for Bayesian inference (BI) analyses are presented above the branches as follows: ML/BI. Bootstrap values  $< 70\%$  or probabilities values  $< 0.95$  are marked with “\*”, and absent analysis values are marked with “-”. Ex-type isolates are marked with “T”. Isolates sequenced in this study are highlighted in bold and shown in color. Two isolates of *Curviciadiella cigna* (CBS 109167 and CBS 109168) were used as outgroups.

tef1

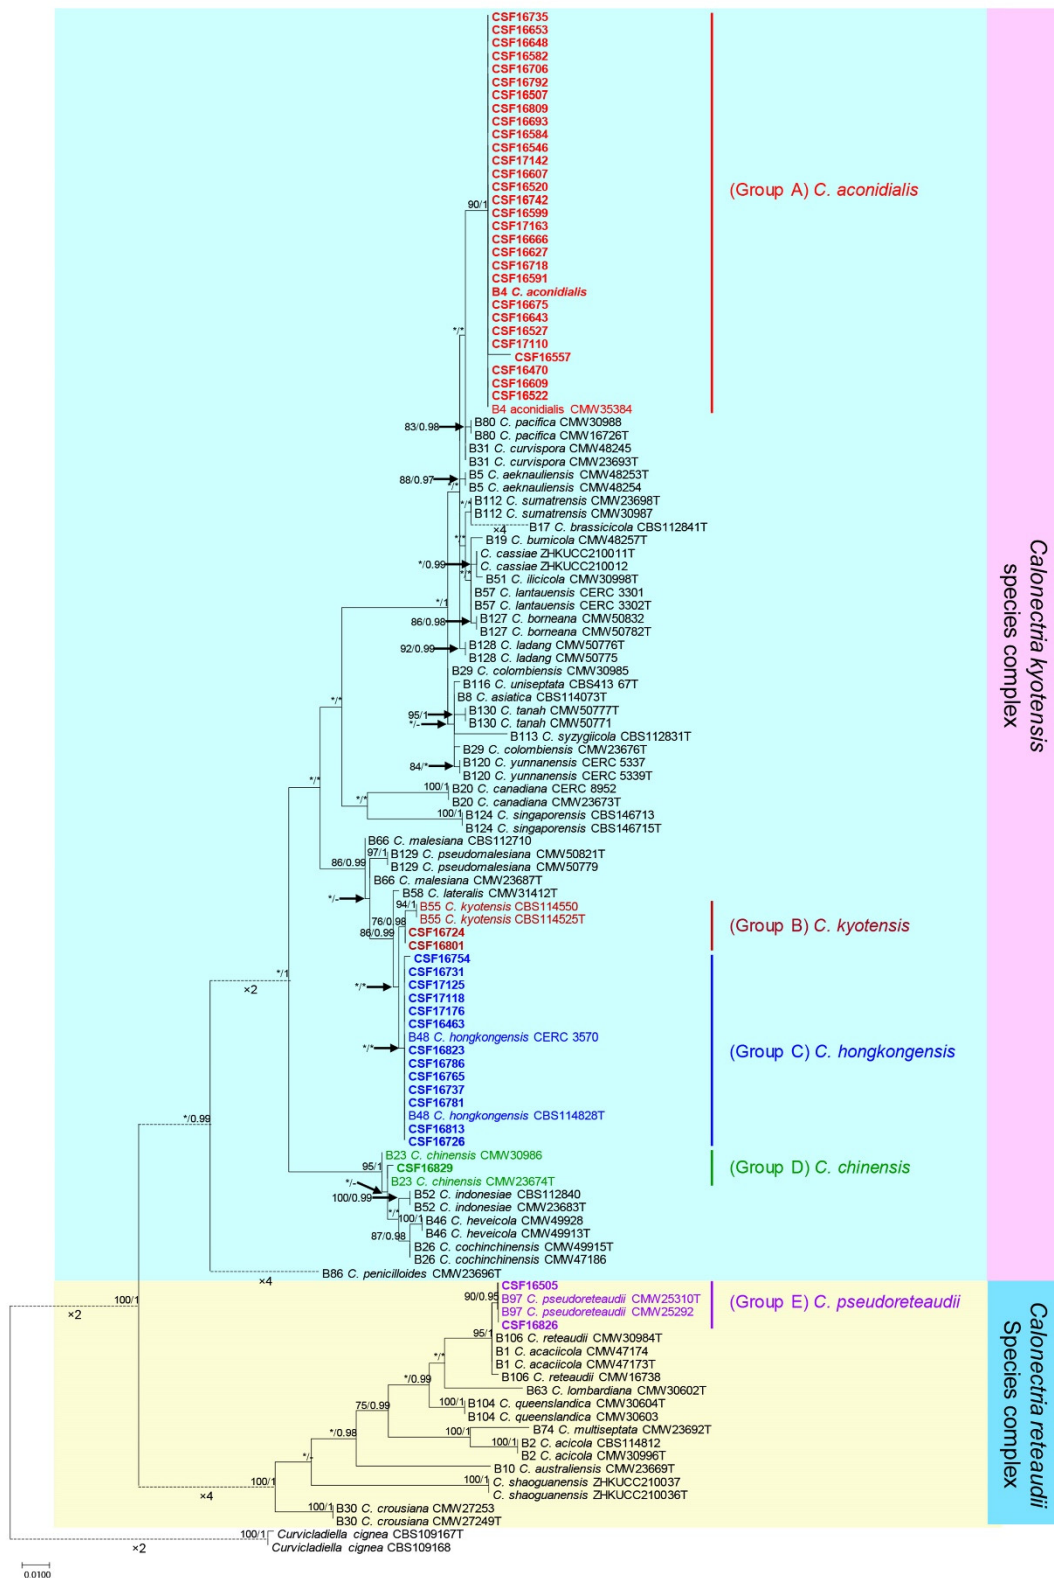

Supplementary Figure S1.

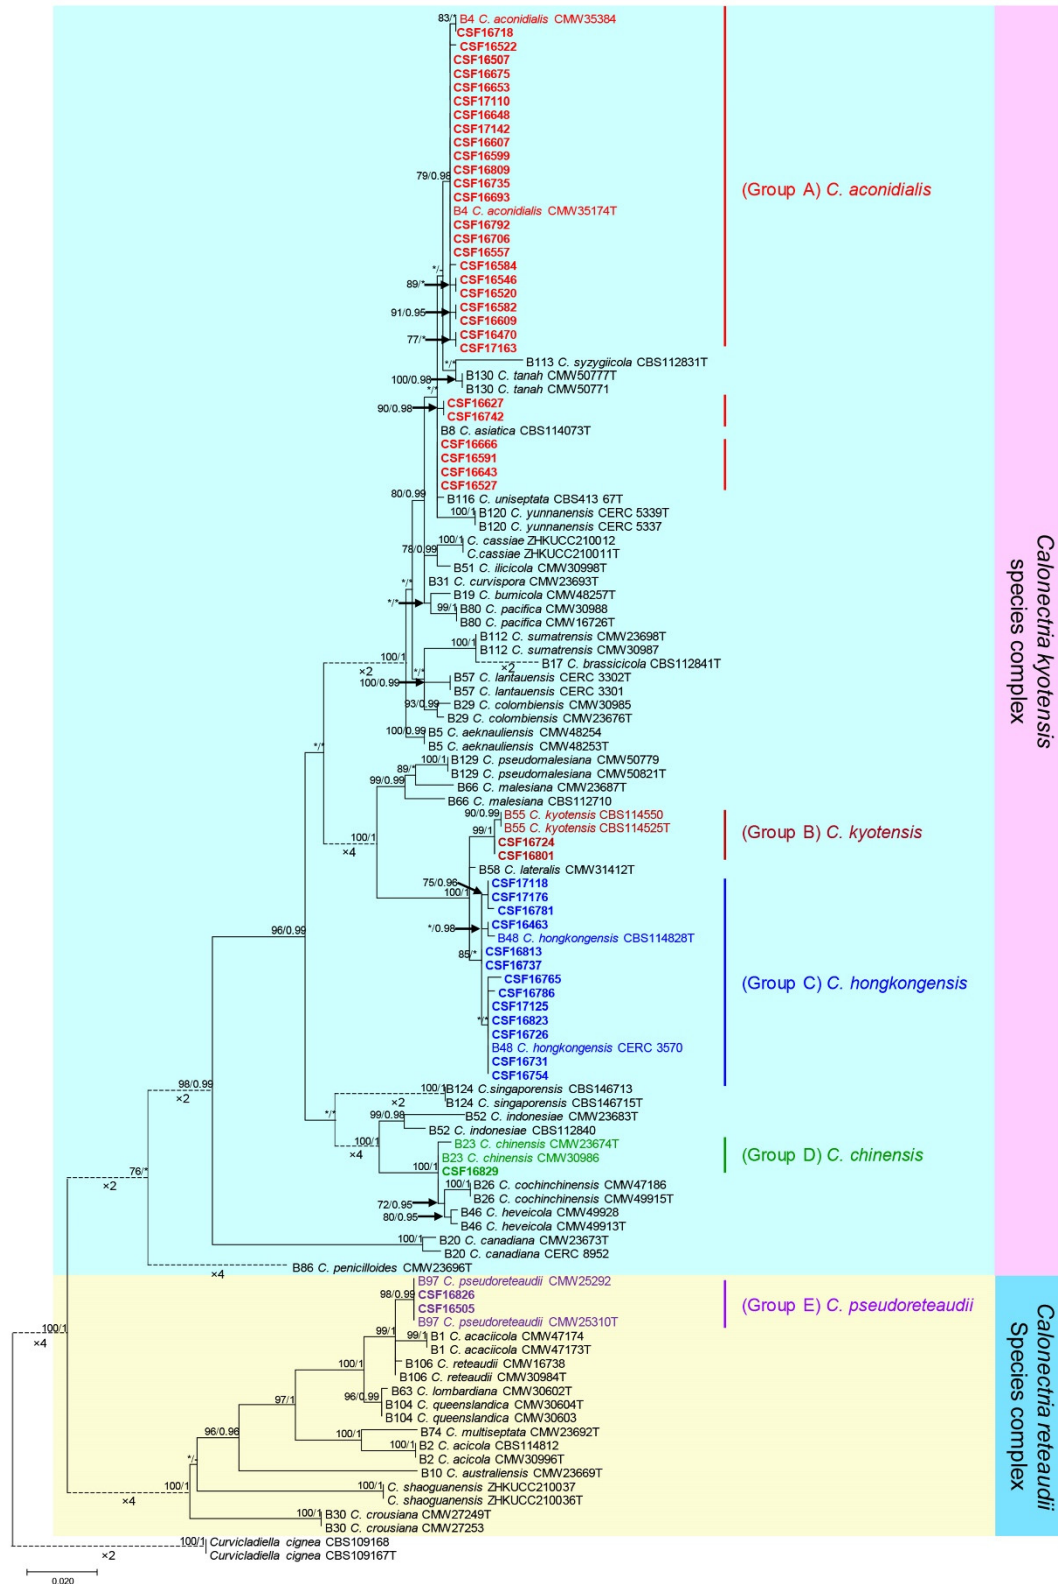

Supplementary Figure S2.

cmdA

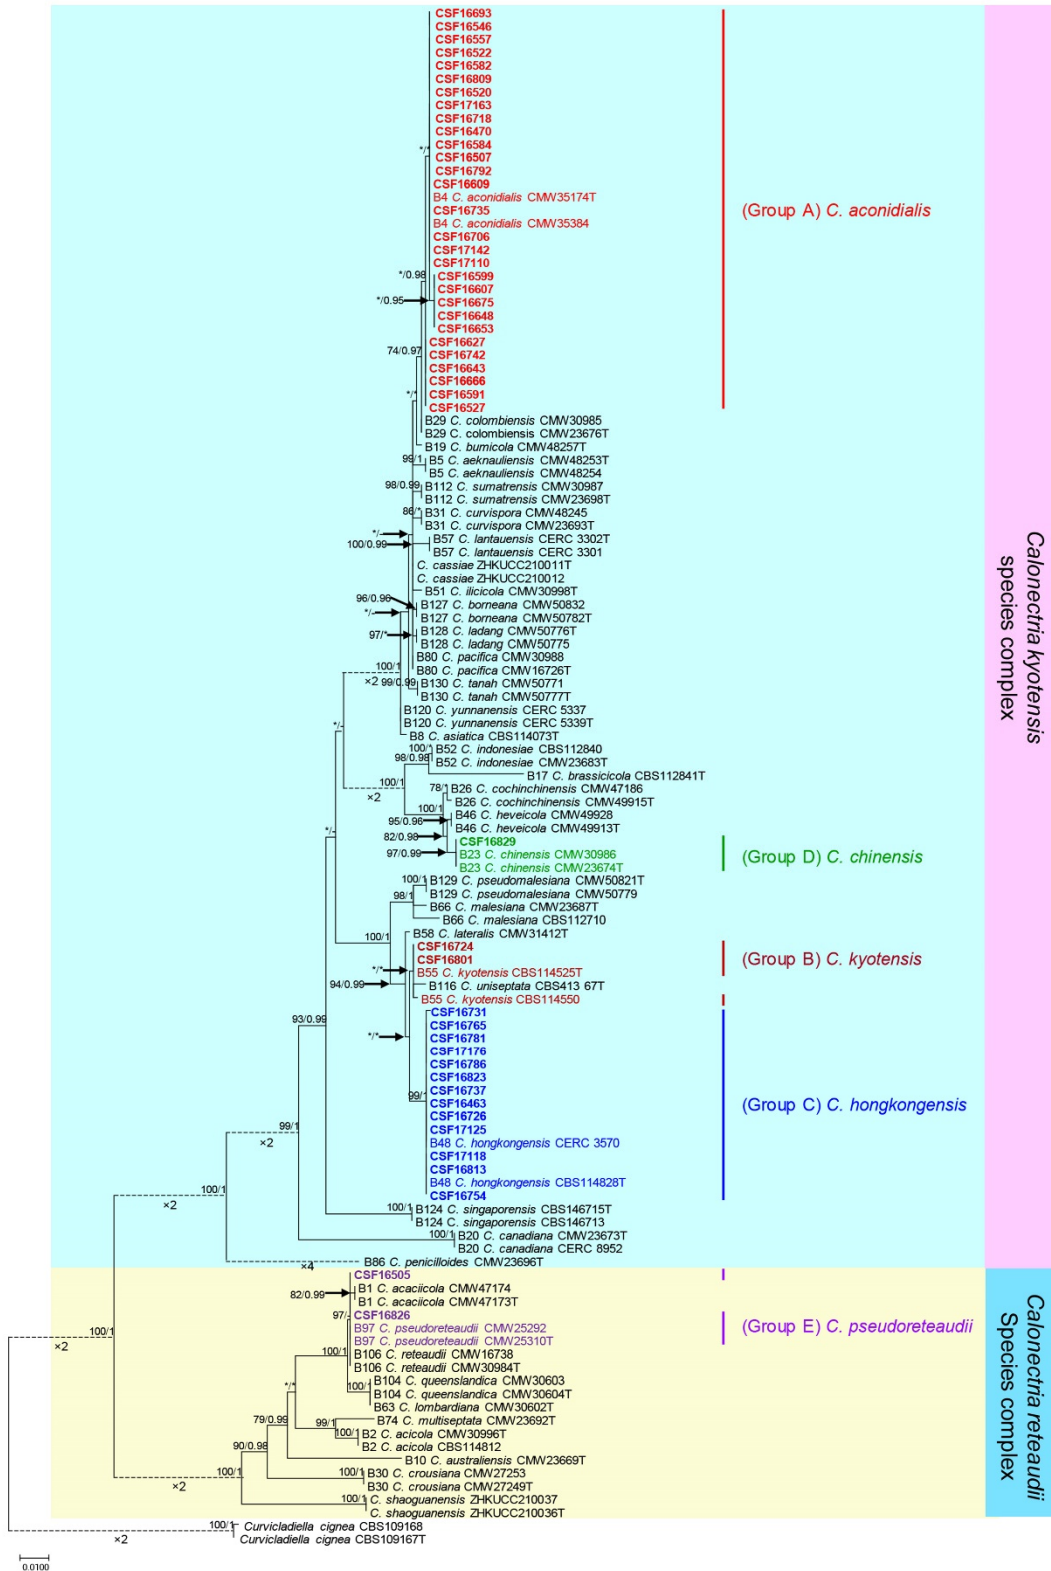

Supplementary Figure S3.

his3

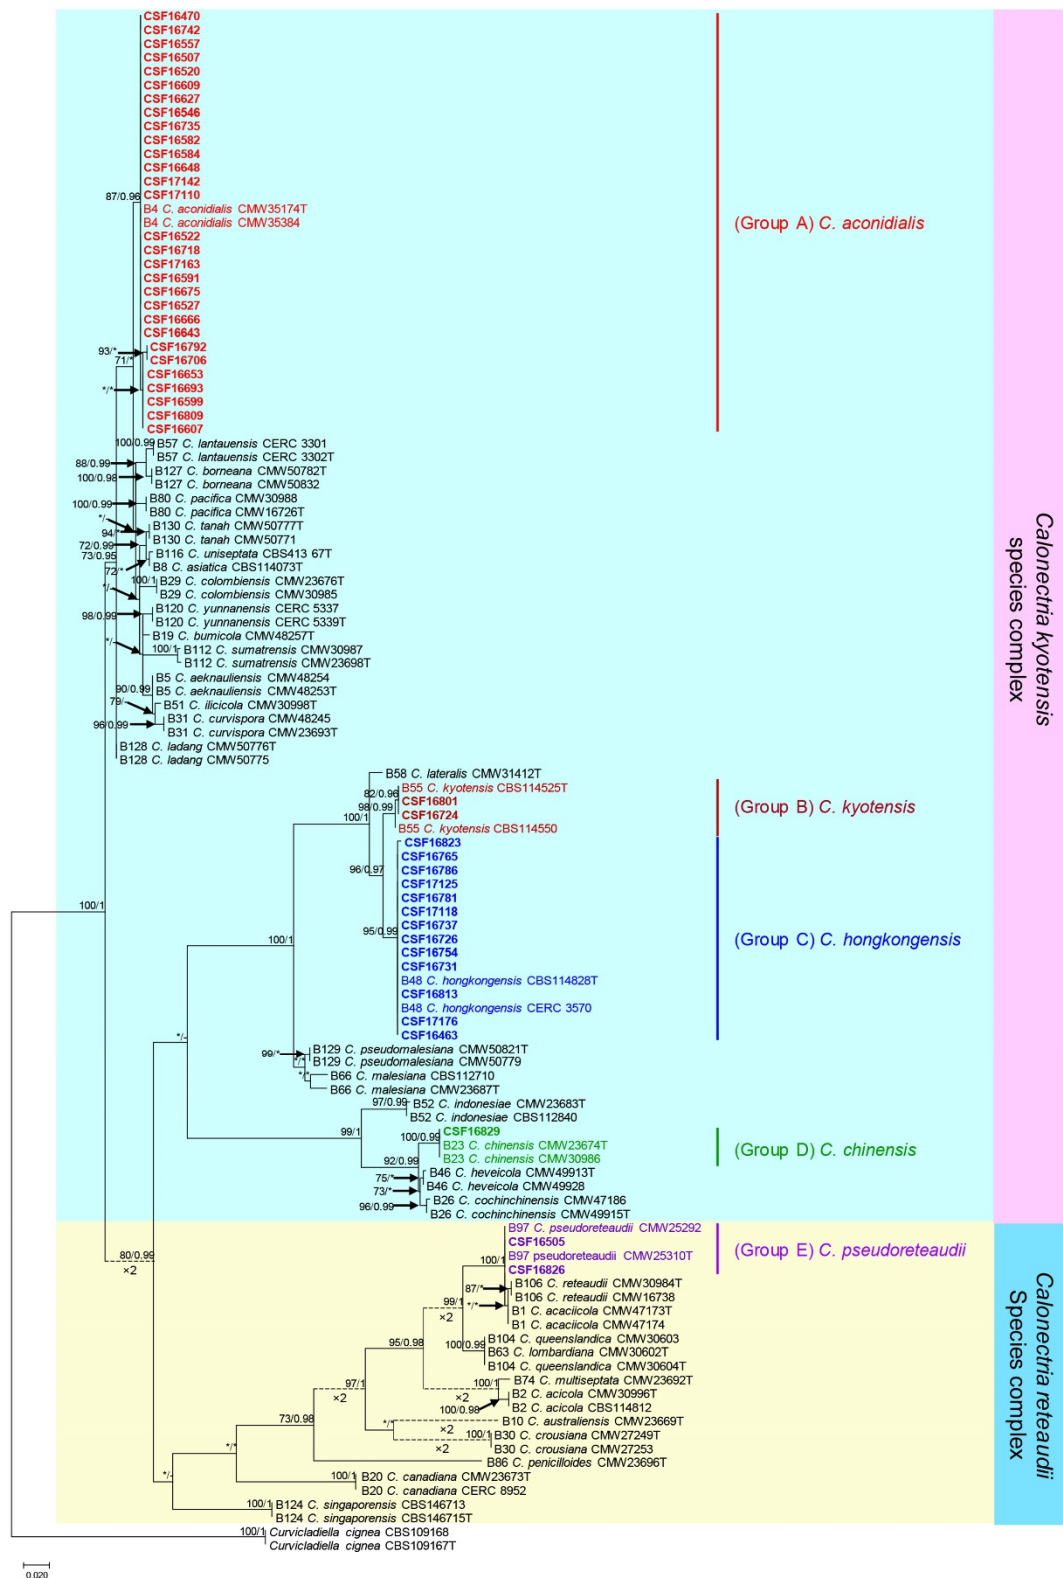

Supplementary Figure S4.
